# Supplementary material for: Comparative Cardiovascular Outcomes of SGLT2 Inhibitors in Type 2 Diabetes Mellitus: A Network Meta-Analysis of Randomized Controlled Trials
Source: Front Endocrinol (Lausanne). 2022 Mar 16;13:802992. doi: 10.3389/fendo.2022.802992 (PMC8967154; doi:10.3389/fendo.2022.802992)
Supplement: Supplementary file 3 [file DataSheet_3.xlsx]

## Sheet: rate of events in the placebo
study	event	total	death %	event	total	CVD %	event	total	VD %
Bailey 2013	1	137	0.00729927	2	137	0.0145985	2	137	0.0145985
Bailey 2015	0	75	0	1	75	0.0133333	1	75	0.0133333
Barnett 2014	3	319	0.00940439	27	319	0.0846395	8	319	0.0250784
Bode 2015	0	237	0	4	237	0.0168776	4	237	0.0168776
Bolinder 2012	0	91	0	4	91	0.043956	0	91	0
Davies 2017	2	646	0.00309598
DeFronzo 2015	0	128	0	7	128	0.0546875	4	128	0.03125
Fioretto 2018	0	161	0	0	161	0	0	161	0
Frías 2016	3	231	0.012987	2	231	0.00865801	0	231	0
Fulcher 2016	2	132	0.0151515				1	132	0.00757576
H¨aring 2014	0	207	0
H¨aring 2015	0	225	0
Han 2018	0	68	0				0	68	0
Henry 2018	0	50	0
Inagaki 2016	0	71	0
Jabbour 2018	1	230	0.00434783	3	230	0.0130435	1	230	0.00434783
Kadowaki 2014	0	109	0	5	87	0.0574713
Kaku 2017	23	511	0.0450098				17	511	0.0332681
Kohan 2014	5	84	0.0595238	6	84	0.0714286	5	84	0.0595238
Kovacs 2015	1	165	0.00606061	16	165	0.0969697	0	165	0
Lavalle-González 2015	3	848	0.00353774	11	483	0.0227743	2	848	0.00235849
Mahaffey 2019	201	2199	0.0914052	361	2199	0.164166
Merton 2018	2	646	0.00309598				7	646	0.0108359
Perkovic 2019	201	2199	0.0914052	361	2199	0.164166
Roden 2016	1	229	0.00436681	13	229	0.0567686	1	229	0.00436681
Romera 2016	0	138	0	2	26	0.0769231	0	138	0
Rosenstock 2016	1	237	0.00421941				1	237	0.00421941
Rosenstock 2015	1	170	0.00588235	12	170	0.0705882
Schumm-Draeger 2015	0	101	0	6	101	0.0594059	0	101	0
Shestakova 2019	0	14	0
Shimada 2018	0	11	0
Søfteland 2017	0	110	0
Stenlo¨ f 2013	2	192	0.0104167				1	192	0.00520833
Strojek 2014	0	146	0	10	146	0.0684932	0	146	0
Tikkanen 2015	0	272	0
Wilding 2013	0	156	0				3	156	0.0192308
Wiviott 2019	570	8582	0.0664181	958	8582	0.111629	207	8569	0.0241568
Yale 2014	2	90	0.0222222				5	90	0.0555556
Yale 2017	2	69	0.0289855				1	69	0.0144928
yang 2016	0	497	0				0	497	0
yang 2018	0	133	0				0	133	0
